# Supplementary material for: Functionalized arene–ruthenium(ii) complexes: dangling vs. tethering side chain
Source: Royal Society of Chemistry journal article supplement (doi:10.1039/c3dt33051f), 2013-01-01
Supplement: c3dt33051f.pdf [file c3dt33051f.pdf]

## Electronic Supplementary Information

### Functionalized arene-ruthenium(II) complexes: dangling vs. tethering side chain

Beatriz Lastra-Barreira,<sup>§</sup> Josefina Díez,<sup>§</sup> Pascale Crochet,<sup>\*,§</sup> Israel  
Fernández<sup>\*,†</sup>

<sup>§</sup> *Laboratorio de Compuestos Organometálicos y Catálisis (Unidad Asociada al CSIC), Departamento de Química Orgánica e Inorgánica - IUQOEM, Universidad de Oviedo, C/ Julián Clavería 8, E-33006 Oviedo, Spain.*

<sup>†</sup> *Departamento de Química Orgánica, Facultad de Química, Universidad Complutense, E-28040 Madrid, Spain.*

#### 1. General methods

2. Preparation of  $[\text{RuCl}(\eta^6\text{:}\kappa^1(\text{O})\text{-C}_6\text{H}_5\text{CH}_2\text{CH}_2\text{CH}_2\text{OH})(\text{PPh}_3)][\text{SbF}_6]$  (5c[ $\text{SbF}_6$ ]).

3. X-ray crystal structure determination of complexes  $2[\text{SbF}_6]_2$ ,  $3[\text{SbF}_6]$  and  $5\text{a}[\text{SbF}_6]$ .

4. Behavior of precursors  $[\text{RuCl}_2(\eta^6\text{-C}_6\text{H}_5\text{XCH}_2\text{CH}_2\text{OH})\{\text{P}(\text{OEt})_3\}]$  (X = O or  $\text{CH}_2$ ) in water (NMR data).

5. Relative energies of  $[\text{RuCl}_2(\eta^6\text{-C}_6\text{H}_5\text{-X-CH}_2\text{CH}_2\text{OH})\{\text{P}(\text{OMe})\}]$  (X = O (1M),  $\text{CH}_2$  (4M)) in function of the dihedral angle  $\text{C}_{\text{ortho}}\text{-C}_{\text{ipso}}\text{-X-C}_{(\text{CH}_2)}$ .

6. Cartesian coordinates and total energies of model complexes 1M and 4M.

## 7. References

**1. General methods.** The manipulations were performed under an atmosphere of dry nitrogen using vacuum-line and standard Schlenk techniques. Solvents were dried by standard methods and distilled under nitrogen before use. All reagents were obtained from commercial suppliers with the exception of compounds  $[\text{RuCl}_2(\eta^6:\kappa^1(O)\text{-C}_6\text{H}_5\text{CH}_2\text{CH}_2\text{CH}_2\text{OH})]$ ,<sup>1,2</sup>  $[\text{RuCl}_2(\eta^6\text{-C}_6\text{H}_5\text{OCH}_2\text{CH}_2\text{OH})(\text{PR}_3)]$  ( $\text{PR}_3 = \text{P}(\text{OPh})_3$  (**1a**),  $\text{P}(\text{OEt})_3$  (**1b**),  $\text{PPh}_3$  (**1c**))<sup>3</sup> and  $[\text{RuCl}_2(\eta^6\text{-C}_6\text{H}_5\text{CH}_2\text{CH}_2\text{CH}_2\text{OH})(\text{PPh}_3)]$  (**4c**),<sup>2</sup> which were prepared by following the method reported in the literature. The C, H elemental analyses were carried out with a Perkin-Elmer 2400 microanalyzer. Infrared spectra were recorded with a Perkin-Elmer 1720-XFT spectrometer. NMR spectra were performed with a Bruker DPX300 instrument at 300 MHz ( $^1\text{H}$ ), 121.5 MHz ( $^{31}\text{P}$ ) or 75.4 MHz ( $^{13}\text{C}$ ) using  $\text{SiMe}_4$  or 85%  $\text{H}_3\text{PO}_4$  as standards. Cyclovoltammetric measurements were performed at 20°C with a “ $\mu$ Autolab type III” apparatus equipped with a three-electrode system. Platinum disk electrode, spiral shaped platinum wire and silver wire were used as working-, counter- and reference-electrodes, respectively. CV experiments were carried out with  $\text{CH}_2\text{Cl}_2$  solutions of the appropriate complex ( $0.5 \times 10^{-3}$  M) and  $[\text{N}^n\text{Bu}_4][\text{PF}_6]$  (0.1 M) as electrolyte. Formal CV potentials ( $E^\circ$ ) are referenced relative to potential of the ferrocinium/ferrocene couple ( $E^\circ = 0.184$  V) run under identical conditions ( $E^\circ = E^\circ(\text{complex}^+/\text{complex}) - E^\circ([\text{Cp}_2\text{Fe}]^+/\text{[Cp}_2\text{Fe]})$ ). A scan rate of 0.5V/s has been employed.

### 2. Preparation of $[\text{RuCl}(\eta^6:\kappa^1(O)\text{-C}_6\text{H}_5\text{CH}_2\text{CH}_2\text{CH}_2\text{OH})(\text{PPh}_3)][\text{SbF}_6]$ (**5c**[ $\text{SbF}_6$ ])

A solution of **4c** (0.100 g, 0.18 mmol) in 20 mL of dichloromethane was treated with  $\text{AgSbF}_6$  (0.072 g, 0.21 mmol, dissolved in 1 mL of MeOH). After stirring 0.5 h at room temperature, the suspension was filtered on Kieselguhr, and the filtrate was evaporated

to dryness. The residue was washed 3 times with 10 mL of diethylether and the resultant yellow solid was dried in vacuum. Yield: 0.110 g (81 %). Anal. Calcd for  $C_{27}H_{27}ClF_6OPRuSb$ : C, 42.08; H, 3.53. Found: C, 41.78; H, 3.71.  $^{31}P\{^1H\}$  NMR,  $CDCl_3$ ,  $\delta$ : 28.3 (s).  $^1H$  NMR,  $CDCl_3$ ,  $\delta$ : 7.78 - 7.36 (m, 15 H,  $PPh_3$ ), 5.38 (d, 2 H,  $^3J_{HH} = 5.9$ ,  $CH_{ortho}$ ), 5.15 (apparent t, 2 H,  $^3J_{HH} \approx ^3J_{HH} \approx 5.6$ ,  $CH_{meta}$ ), 4.55 (td, 1 H,  $^3J_{HH} = 5.4$ ,  $^3J_{PH} = 2.1$ ,  $CH_{para}$ ), 3.80 (very broad s,  $CH_2OH$ ), 2.82 (t, 2 H,  $^3J_{HH} = 7.2$ ,  $PhCH_2$ ), 1.98 (m, 2 H,  $CH_2CH_2OH$ ), OH not observed. IR,  $\nu_{OH} = 3456\text{ cm}^{-1}$ . The spectroscopic data of compound **5c**[**SbF<sub>6</sub>**] are very similar to those of the  $BF_4$ -salt reported previously.<sup>2</sup>

**3. X-ray crystal structure determination of compounds  $2[\text{SbF}_6]_2$ ,  $3[\text{SbF}_6]$  and  $5a[\text{SbF}_6]$ .** Single crystals suitable for X-ray diffraction analyses were obtained by slow diffusion of diethylether through saturated solutions of  $2[\text{SbF}_6]_2$ ,  $3[\text{SbF}_6]$  or  $5a[\text{SbF}_6]$  in acetone. Crystallographic data have been deposited with the Cambridge Crystallographic Data Center as supplementary publications Nos. CCDC 908513 ( $2[\text{SbF}_6]_2$ ), 908514 ( $3[\text{SbF}_6]$ ), 908515 ( $5a[\text{SbF}_6]$ ). Copies of the data can be obtained free of charge *via* [www.ccdc.cam.ac.uk/data\\_request/cif](http://www.ccdc.cam.ac.uk/data_request/cif). The most relevant crystal and refinement data are collected in Tables S1, S3 and S5. Diffraction data of compound  $2[\text{SbF}_6]_2$  were recorded on a Nonius KappaCCD single crystal diffractometer, using Mo-K $\alpha$  radiation ( $\lambda = 0.71073 \text{ \AA}$ ). Images were collected at a 35 mm fixed crystal-detector distance, using the oscillation method, with  $1^\circ$  oscillation and 50 s exposure time per frame. Data collection strategy was calculated with the program Collect.<sup>4</sup> Data reduction and cell refinement were performed with the programs HKL Denzo and Scalepack.<sup>5</sup> A semi-empirical absorption correction was applied using the program SORTAV.<sup>6</sup> For derivatives  $3[\text{SbF}_6]$  and  $5a[\text{SbF}_6]$ , data collection was performed on a Oxford Diffraction Xcalibur Nova single crystal diffractometer, using Cu-K $\alpha$  radiation ( $\lambda = 1.5418 \text{ \AA}$ ). Images were collected at a 63 mm fixed crystal-detector distance, using the oscillation method, with  $1^\circ$  oscillation and variable exposure time per image (1.5-5 s for  $3[\text{SbF}_6]$  and 2-15 s for  $5a[\text{SbF}_6]$ ). Data collection strategy was calculated with the program *CrysAlis<sup>Pro</sup> CCD*.<sup>7</sup> Data reduction and cell refinement were performed with the program *CrysAlis<sup>Pro</sup> RED*.<sup>7</sup> An empirical absorption correction was applied using the SCALE3 ABSPACK algorithm as implemented in the program *CrysAlis<sup>Pro</sup> RED*.<sup>7</sup> In all cases, the software package WINGX<sup>8</sup> was used for space group determination, structure solution and refinement. The structure of complex  $2[\text{SbF}_6]_2$  was solved by direct methods using SIR92.<sup>9</sup> For  $3[\text{SbF}_6]$  and  $5a[\text{SbF}_6]$ , the structures were solved by Patterson interpretation and phase expansion using DIRDIF.<sup>10</sup> The crystal of  $3[\text{SbF}_6]$

and **5a[SbF<sub>6</sub>]** contains, respectively, two diethylether and one acetone molecules of solvation per formula unit. Isotropic least-squares refinement on  $F^2$  using SHELXL97<sup>11</sup> was performed. During the final stages of the refinements, all the positional parameters and the anisotropic temperature factors of all the non-H atoms were refined. The hydrogen atoms were geometrically located riding on their parent atoms with isotropic displacement parameters set to 1.2 times the  $U_{eq}$  of the atoms to which they are attached (1.5 for methyl groups), (except H1O for **5a[SbF<sub>6</sub>]**, the coordinates of this hydrogen atom were found from different Fourier maps and included in a refinement with isotropic parameters). The function minimized was  $(\sum w F_o^2 - F_c^2)/\sum w(F_o^2)^{1/2}$  where  $w = 1/[\sigma^2(F_o^2) + (aP)^2 + bP]$  (a and b values are collected in Tables S1, S3 and S5) with  $\sigma(F_o^2)$  from counting statistics and  $P = (\text{Max}(F_o^2, 0) + 2F_c^2)/3$ . Atomic scattering factors were taken from the International Tables for X-Ray Crystallography.<sup>12</sup> Geometrical calculations were made with PARST.<sup>13</sup> The crystallographic plots were made with PLATON.<sup>14</sup>

**Table S1.** Crystal data and structure refinement details for **2[SbF<sub>6</sub>]<sub>2</sub>**.

|                                                                                                                                                                                                                                                      | Compound <b>2[SbF<sub>6</sub>]<sub>2</sub></b>                                                                                 |
|------------------------------------------------------------------------------------------------------------------------------------------------------------------------------------------------------------------------------------------------------|--------------------------------------------------------------------------------------------------------------------------------|
| Empirical formula                                                                                                                                                                                                                                    | C <sub>52</sub> H <sub>50</sub> Cl <sub>2</sub> F <sub>12</sub> O <sub>10</sub> P <sub>2</sub> Ru <sub>2</sub> Sb <sub>2</sub> |
| Formula weight                                                                                                                                                                                                                                       | 1641.4                                                                                                                         |
| Temperature (K)                                                                                                                                                                                                                                      | 150(2)                                                                                                                         |
| Wavelength (Å)                                                                                                                                                                                                                                       | 0.71073                                                                                                                        |
| Crystal system                                                                                                                                                                                                                                       | Monoclinic                                                                                                                     |
| Space group                                                                                                                                                                                                                                          | P 2 <sub>1</sub> /c                                                                                                            |
| <i>Unit cell dimensions</i>                                                                                                                                                                                                                          |                                                                                                                                |
| a (Å)                                                                                                                                                                                                                                                | 9.9387(3)                                                                                                                      |
| b (Å)                                                                                                                                                                                                                                                | 11.8480(4)                                                                                                                     |
| c (Å)                                                                                                                                                                                                                                                | 24.2871(7)                                                                                                                     |
| α (°)                                                                                                                                                                                                                                                | 90                                                                                                                             |
| β (°)                                                                                                                                                                                                                                                | 92.775(2)                                                                                                                      |
| γ (°)                                                                                                                                                                                                                                                | 90                                                                                                                             |
| Volume (Å <sup>3</sup> )                                                                                                                                                                                                                             | 2856.5(1)                                                                                                                      |
| Z                                                                                                                                                                                                                                                    | 2                                                                                                                              |
| Calculated density (g.cm <sup>-3</sup> )                                                                                                                                                                                                             | 1.908                                                                                                                          |
| F(000)                                                                                                                                                                                                                                               | 1608                                                                                                                           |
| Crystal size (mm)                                                                                                                                                                                                                                    | 0.25 x 0.20 x 0.10                                                                                                             |
| Theta range for data collected                                                                                                                                                                                                                       | 1.91 to 25.36°                                                                                                                 |
| Reflections collected                                                                                                                                                                                                                                | 18346                                                                                                                          |
| Independent reflections                                                                                                                                                                                                                              | 5227 [R(int) = 0.037]                                                                                                          |
| Completeness to theta max                                                                                                                                                                                                                            | 100.0%                                                                                                                         |
| Data / restraints / parameters                                                                                                                                                                                                                       | 5227 / 0 / 370                                                                                                                 |
| Weight function (a, b)                                                                                                                                                                                                                               | 0.0620, 0.0                                                                                                                    |
| Final R indices [I>2σ(I)]                                                                                                                                                                                                                            |                                                                                                                                |
| R <sub>1</sub> <sup>[a]</sup>                                                                                                                                                                                                                        | 0.0479                                                                                                                         |
| wR <sub>2</sub> <sup>[b]</sup>                                                                                                                                                                                                                       | 0.1234                                                                                                                         |
| R indices (all data)                                                                                                                                                                                                                                 |                                                                                                                                |
| R <sub>1</sub> <sup>[a]</sup>                                                                                                                                                                                                                        | 0.0721                                                                                                                         |
| wR <sub>2</sub> <sup>[b]</sup>                                                                                                                                                                                                                       | 0.1459                                                                                                                         |
| Largest diff. peak and hole                                                                                                                                                                                                                          | 1.695 and -1.109 e.Å <sup>3</sup>                                                                                              |
| <sup>[a]</sup> R <sub>1</sub> = Σ( F <sub>o</sub>   -  F <sub>c</sub>  )/Σ F <sub>o</sub>  . <sup>[b]</sup> wR <sub>2</sub> = {Σ[w(F <sub>o</sub> <sup>2</sup> - F <sub>c</sub> <sup>2</sup> )]/Σ[w(F <sub>o</sub> <sup>2</sup> )]} <sup>1/2</sup> . |                                                                                                                                |

**Table S2.** Selected bond lengths (Å) and angles (°) for **2**[SbF<sub>6</sub>]<sub>2</sub>.

| Bond lengths |           | Bond angles           |           |
|--------------|-----------|-----------------------|-----------|
| Ru(1)-Cl(1)  | 2.429(1)  | Cl(1)-Ru(1)-Cl(1a)    | 79.91(5)  |
| Ru(1)-Cl(1a) | 2.436(1)  | Cl(1)-Ru(1)-P(1)      | 88.75(5)  |
| Ru(1)-P(1)   | 2.284(2)  | Cl(1a)-Ru(1)-P(1)     | 92.93(5)  |
| Ru(1)-C*     | 1.7488(4) | Cl(1)-Ru(1)-C*        | 128.66(4) |
| C(4)-O(1)    | 1.327(7)  | P(1)-Ru(1)-C*         | 127.56(4) |
| O(1)-C(7)    | 1.451(8)  | Cl(1a)-Ru(1)-C*       | 124.93(4) |
| C(8)-O(2)    | 1.421(9)  | Ru(1)-Cl(1)-Ru(1a)    | 100.09(5) |
| Ru(1)-C(1)   | 2.229(6)  | C(4)-O(1)-C(7)        | 119.3(5)  |
| Ru(1)-C(2)   | 2.183(5)  |                       |           |
| Ru(1)-C(3)   | 2.214(5)  | <b>Torsion angles</b> |           |
| Ru(1)-C(4)   | 2.340(6)  | C(3)-C(4)-O(1)-C(7)   | -0.6(8)   |
| Ru(1)-C(5)   | 2.302(6)  | P(1)-Ru(1)-C*-C(4)    | 131.3     |
| Ru(1)-C(6)   | 2.228(6)  |                       |           |

C\*: centroid of the arene ring (C(1), C(2), C(3), C(4), C(5) and C(6) carbon atoms).

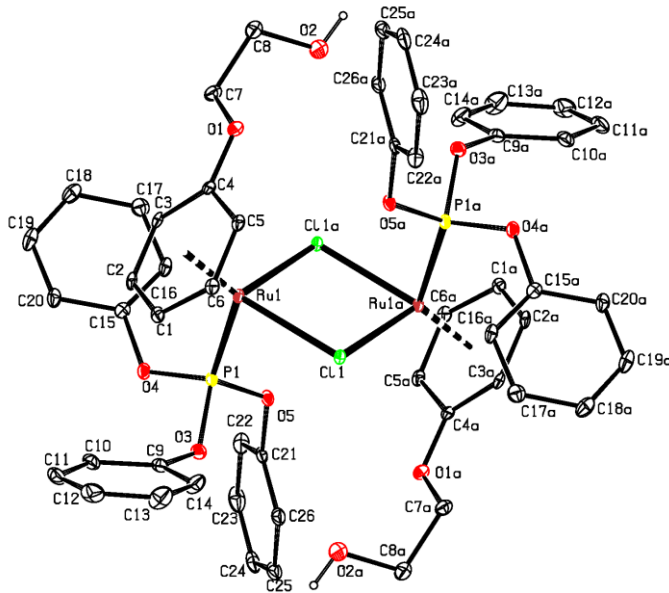

**Table S3.** Crystal data and structure refinement details for **3[SbF<sub>6</sub>]**.

|                                          | Compound <b>3[SbF<sub>6</sub>]</b>                                                                                                               |
|------------------------------------------|--------------------------------------------------------------------------------------------------------------------------------------------------|
| Empirical formula                        | C <sub>52</sub> H <sub>50</sub> Cl <sub>3</sub> F <sub>6</sub> O <sub>4</sub> P <sub>2</sub> Ru <sub>2</sub> Sb·2OC <sub>4</sub> H <sub>10</sub> |
| Formula weight                           | 1493.34                                                                                                                                          |
| Temperature (K)                          | 100(2)                                                                                                                                           |
| Wavelength (Å)                           | 1.5418                                                                                                                                           |
| Crystal system                           | Monoclinic                                                                                                                                       |
| Space group                              | C 2/c                                                                                                                                            |
| <i>Unit cell dimensions</i>              |                                                                                                                                                  |
| a (Å)                                    | 31.342(1)                                                                                                                                        |
| b (Å)                                    | 14.4711(7)                                                                                                                                       |
| c (Å)                                    | 15.0960(5)                                                                                                                                       |
| α (°)                                    | 90                                                                                                                                               |
| β (°)                                    | 114.850(4)                                                                                                                                       |
| γ (°)                                    | 90                                                                                                                                               |
| Volume (Å <sup>3</sup> )                 | 6213.0(4)                                                                                                                                        |
| Z                                        | 4                                                                                                                                                |
| Calculated density (g.cm <sup>-1</sup> ) | 1.597                                                                                                                                            |
| F(000)                                   | 3008                                                                                                                                             |
| Crystal size (mm)                        | 0.316 x 0.085 x 0.037                                                                                                                            |
| Theta range for data collected           | 3.11 to 66.98°                                                                                                                                   |
| Reflections collected                    | 17101                                                                                                                                            |
| Independent reflections                  | 5479 [R(int) = 0.0401]                                                                                                                           |
| Completeness to theta max                | 99.2%                                                                                                                                            |
| Data / restraints / parameters           | 5479 / 0 / 341                                                                                                                                   |
| Weight function (a, b)                   | 0.0805, 0                                                                                                                                        |
| Final R indices [I>2σ(I)]                |                                                                                                                                                  |
| R <sub>1</sub> <sup>[a]</sup>            | 0.0423                                                                                                                                           |
| wR <sub>2</sub> <sup>[b]</sup>           | 0.1165                                                                                                                                           |
| R indices (all data)                     |                                                                                                                                                  |
| R <sub>1</sub> <sup>[a]</sup>            | 0.0526                                                                                                                                           |
| wR <sub>2</sub> <sup>[b]</sup>           | 0.1206                                                                                                                                           |
| Largest diff. peak and hole              | 1.885 and -2.202 e.Å <sup>3</sup>                                                                                                                |

<sup>[a]</sup>  $R_1 = \Sigma(|F_o| - |F_c|) / \Sigma|F_o|$ . <sup>[b]</sup>  $wR_2 = \{\Sigma[w(F_o^2 - F_c^2)^2] / \Sigma[w(F_o^2)^2]\}^{1/2}$ .

**Table S4.** Selected bond lengths (Å) and angles (°) for **3[SbF<sub>6</sub>]**.

| Bond lenght |           | Bond angles           |           |
|-------------|-----------|-----------------------|-----------|
| Ru(1)-Cl(1) | 2.4271(8) | Cl(2)-Ru(1)-Cl(1)     | 91.45(3)  |
| Ru(1)-Cl(2) | 2.414(1)  | Cl(1)-Ru(1)-P(1)      | 86.80(4)  |
| Ru(1)-P(1)  | 2.341(1)  | Cl(2)-Ru(1)-P(1)      | 86.28(4)  |
| Ru(1)-C*    | 1.722(3)  | Cl(1)-Ru(1)-C*        | 124.82(2) |
| C(4)-O(1)   | 1.341(8)  | Cl(2)-Ru(1)-C*        | 124.38(3) |
| O(1)-C(7)   | 1.429(9)  | P(1)-Ru(1)-C*         | 130.53(3) |
| C(8)-O(2)   | 1.414(9)  | Ru(1)-Cl(1)-Ru(1a)    | 117.59(6) |
| Ru(1)-C(1)  | 2.215(5)  | C(4)-O(1)-C(7)        | 119.6(6)  |
| Ru(1)-C(2)  | 2.164(4)  |                       |           |
| Ru(1)-C(3)  | 2.174(5)  | <b>Torsion angles</b> |           |
| Ru(1)-C(4)  | 2.304(5)  | C(3)-C(4)-O(1)-C(7)   | 4.6(9)    |
| Ru(1)-C(5)  | 2.267(5)  | P(1)-Ru(1)-C*-C(4)    | 139.9     |
| Ru(1)-C(6)  | 2.184(4)  |                       |           |

C\*: centroid of the arene ring (C(1), C(2), C(3), C(4), C(5) and C(6) carbon atoms).

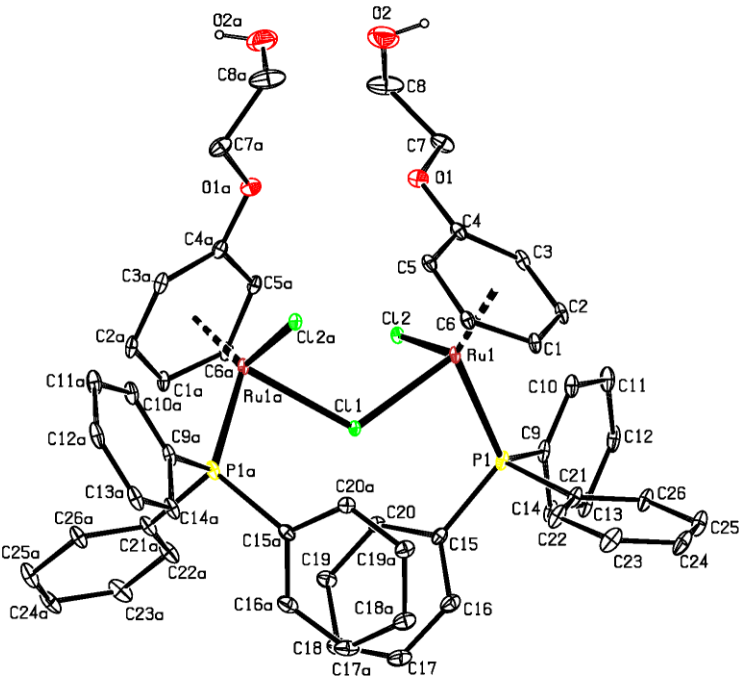

**Table S5.** Crystal data and structure refinement details for **5a[SbF<sub>6</sub>]**.

|                                                                                                                                                                                                                                                                                  | Compound <b>5a[SbF<sub>6</sub>]</b>                                                                   |
|----------------------------------------------------------------------------------------------------------------------------------------------------------------------------------------------------------------------------------------------------------------------------------|-------------------------------------------------------------------------------------------------------|
| Empirical formula                                                                                                                                                                                                                                                                | C <sub>28</sub> H <sub>23</sub> ClF <sub>6</sub> O <sub>4</sub> PRuSb·OC <sub>2</sub> H <sub>10</sub> |
| Formula weight                                                                                                                                                                                                                                                                   | 876.80                                                                                                |
| Temperature (K)                                                                                                                                                                                                                                                                  | 293(2)                                                                                                |
| Wavelength (Å)                                                                                                                                                                                                                                                                   | 1.5418                                                                                                |
| Crystal system                                                                                                                                                                                                                                                                   | Monoclinic                                                                                            |
| Space group                                                                                                                                                                                                                                                                      | P21/n                                                                                                 |
| <i>Unit cell dimensions</i>                                                                                                                                                                                                                                                      |                                                                                                       |
| a (Å)                                                                                                                                                                                                                                                                            | 11.7393(1)                                                                                            |
| b (Å)                                                                                                                                                                                                                                                                            | 19.5779(2)                                                                                            |
| c (Å)                                                                                                                                                                                                                                                                            | 15.0206(1)                                                                                            |
| α (°)                                                                                                                                                                                                                                                                            | 90                                                                                                    |
| β (°)                                                                                                                                                                                                                                                                            | 99.505(1)                                                                                             |
| γ (°)                                                                                                                                                                                                                                                                            | 90                                                                                                    |
| Volume (Å <sup>3</sup> )                                                                                                                                                                                                                                                         | 3404.80(5)                                                                                            |
| Z                                                                                                                                                                                                                                                                                | 4                                                                                                     |
| Calculated density (g.cm <sup>-1</sup> )                                                                                                                                                                                                                                         | 1.710                                                                                                 |
| F(000)                                                                                                                                                                                                                                                                           | 1736                                                                                                  |
| Crystal size (mm)                                                                                                                                                                                                                                                                | 0.167 x 0.127 x 0.087                                                                                 |
| Theta range for data collected                                                                                                                                                                                                                                                   | 3.74 to 73.98°                                                                                        |
| Reflections collected                                                                                                                                                                                                                                                            | 23902                                                                                                 |
| Independent reflections                                                                                                                                                                                                                                                          | 6878 [R(int) = 0.0218]                                                                                |
| Completeness to theta max                                                                                                                                                                                                                                                        | 99.5 %                                                                                                |
| Data / restraints / parameters                                                                                                                                                                                                                                                   | 6878 / 11 / 392                                                                                       |
| Weight function (a, b)                                                                                                                                                                                                                                                           | 0.099, 7.3304                                                                                         |
| Final R indices [I>2σ(I)]                                                                                                                                                                                                                                                        |                                                                                                       |
| R <sub>1</sub> <sup>[a]</sup>                                                                                                                                                                                                                                                    | 0.0583                                                                                                |
| wR <sub>2</sub> <sup>[b]</sup>                                                                                                                                                                                                                                                   | 0.1673                                                                                                |
| R indices (all data)                                                                                                                                                                                                                                                             |                                                                                                       |
| R <sub>1</sub> <sup>[a]</sup>                                                                                                                                                                                                                                                    | 0.0607                                                                                                |
| wR <sub>2</sub> <sup>[b]</sup>                                                                                                                                                                                                                                                   | 0.1701                                                                                                |
| Largest diff. peak and hole                                                                                                                                                                                                                                                      | 2.422 and -1.824 e.Å <sup>-3</sup>                                                                    |
| <sup>[a]</sup> R <sub>1</sub> = Σ( F <sub>o</sub>   -  F <sub>c</sub>  )/Σ F <sub>o</sub>  . <sup>[b]</sup> wR <sub>2</sub> = {Σ[w(F <sub>o</sub> <sup>2</sup> - F <sub>c</sub> <sup>2</sup> ) <sup>2</sup> ]/Σ[w(F <sub>o</sub> <sup>2</sup> ) <sup>2</sup> ]} <sup>1/2</sup> . |                                                                                                       |

**Table S6.** Selected bond lengths (Å) and angles (°) for **5a**[SbF<sub>6</sub>].

| Bond length |           | Bond angles      |           |
|-------------|-----------|------------------|-----------|
| Ru(1)-Cl(1) | 2.384(2)  | Cl(1)-Ru(1)-O(1) | 84.0(2)   |
| Ru(1)-O(1)  | 2.145(5)  | Cl(1)-Ru(1)-P(1) | 84.41(5)  |
| Ru(1)-P(1)  | 2.297(1)  | O(1)-Ru(1)-P(1)  | 88.3(2)   |
| Ru(1)-C*    | 1.7006(4) | Cl(1)-Ru(1)-C*   | 127.95(5) |
| Ru(1)-C(1)  | 2.188(7)  | O(1)-Ru(1)-C*    | 126.5(1)  |
| Ru(1)-C(2)  | 2.187(7)  | P(1)-Ru(1)-C*    | 130.45(4) |
| Ru(1)-C(3)  | 2.213(6)  |                  |           |
| Ru(1)-C(4)  | 2.227(7)  |                  |           |
| Ru(1)-C(5)  | 2.209(7)  |                  |           |
| Ru(1)-C(6)  | 2.182(6)  |                  |           |

C\*: centroid of the arene ring (C(1), C(2), C(3), C(4), C(5) and C(6) carbon atoms).

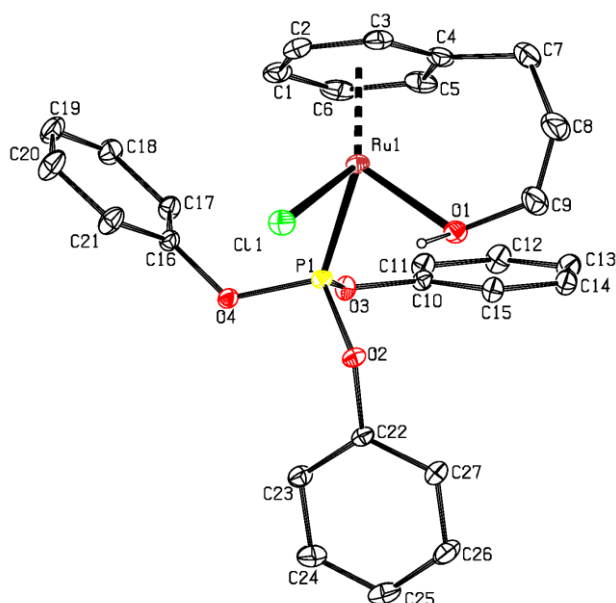

#### 4. Behavior of precursors $[\text{RuCl}_2(\eta^6\text{-C}_6\text{H}_5\text{XCH}_2\text{CH}_2\text{OH})\{\text{P}(\text{OEt})_3\}]$ ( $\text{X} = \text{O}$ or $\text{CH}_2$ ) in water.

Aqueous solutions of  $[\text{RuCl}_2(\eta^6\text{-C}_6\text{H}_5\text{OCH}_2\text{CH}_2\text{OH})\{\text{P}(\text{OEt})_3\}]$  (**1b**) and  $[\text{RuCl}_2(\eta^6\text{-C}_6\text{H}_5\text{CH}_2\text{CH}_2\text{CH}_2\text{OH})\{\text{P}(\text{OEt})_3\}]$  (**4b**) were prepared with 20 mg of **1b** or **4b** in 0.6 mL of  $\text{D}_2\text{O}$ , and  $^1\text{H}$  and  $^{31}\text{P}\{^1\text{H}\}$  spectra were recorded on a Bruker DPX300 apparatus.

##### $^{31}\text{P}\{^1\text{H}\}$ NMR spectra:

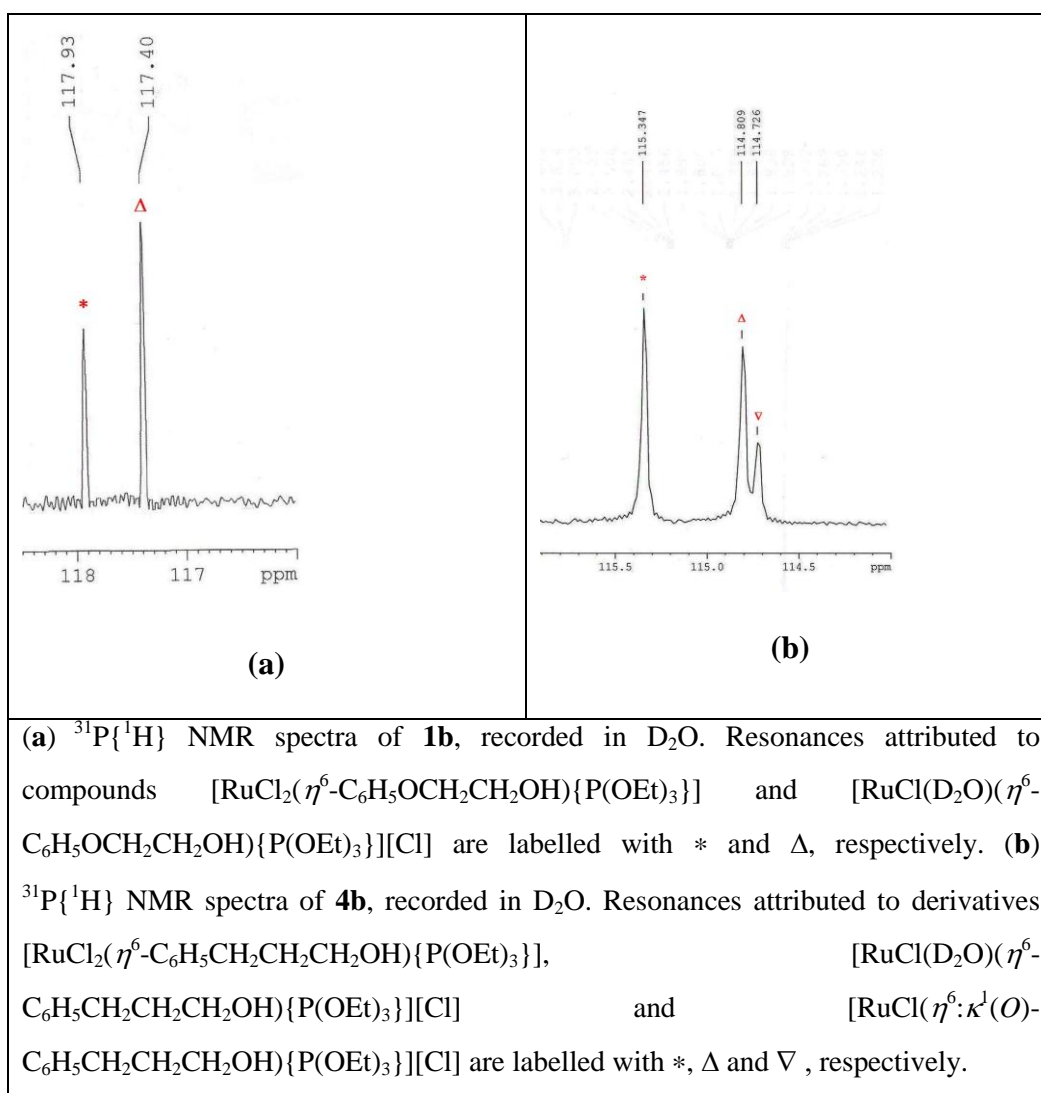

$^1\text{H}$  (and  $^{13}\text{C}\{^1\text{H}\}$ ) NMR data are in complete agreement with the presence of both  $[\text{RuCl}_2(\eta^6\text{-C}_6\text{H}_5\text{OCH}_2\text{CH}_2\text{OH})\{\text{P}(\text{OEt})_3\}]$  and  $[\text{RuCl}(\text{D}_2\text{O})(\eta^6\text{-C}_6\text{H}_5\text{OCH}_2\text{CH}_2\text{OH})\{\text{P}(\text{OEt})_3\}][\text{Cl}]$  in the sample (a) and with the presence of  $[\text{RuCl}_2(\eta^6\text{-C}_6\text{H}_5\text{CH}_2\text{CH}_2\text{CH}_2\text{OH})\{\text{P}(\text{OEt})_3\}]$  and  $[\text{RuCl}(\eta^6\text{-}\kappa^1(\text{O})\text{-C}_6\text{H}_5\text{CH}_2\text{CH}_2\text{CH}_2\text{OH})\{\text{P}(\text{OEt})_3\}][\text{Cl}]$  in the sample (b).

$\text{C}_6\text{H}_5\text{CH}_2\text{CH}_2\text{CH}_2\text{OH}\{\text{P}(\text{OEt})_3\}$ ],  $[\text{RuCl}(\text{D}_2\text{O})(\eta^6\text{-C}_6\text{H}_5\text{CH}_2\text{CH}_2\text{CH}_2\text{OH})\{\text{P}(\text{OEt})_3\}][\text{Cl}]$  and  $[\text{RuCl}(\eta^6:\kappa^1(\text{O})\text{-C}_6\text{H}_5\text{CH}_2\text{CH}_2\text{CH}_2\text{OH})\{\text{P}(\text{OEt})_3\}][\text{Cl}]$  in the sample (b). Data are the following:

***Spectroscopic data of  $[\text{RuCl}_2(\eta^6\text{-C}_6\text{H}_5\text{OCH}_2\text{CH}_2\text{CH}_2\text{OH})\{\text{P}(\text{OEt})_3\}]$ .***

$^{31}\text{P}\{^1\text{H}\}$  NMR,  $\text{D}_2\text{O}$ ,  $\delta$ : 118.0 (s).

$^1\text{H}$  NMR,  $\text{D}_2\text{O}$ ,  $\delta$ : 6.12 (broad s, 2 H,  $\text{CH}_{\text{meta}}$ ), 5.58 (broad s, 2 H,  $\text{CH}_{\text{ortho}}$ ), 5.22 (broad s, 1 H,  $\text{CH}_{\text{para}}$ ), 4.35 (broad s, 2 H,  $\text{OCH}_2$ ), 4.15 (m, 6 H,  $\text{CH}_2\text{CH}_3$ ), 4.00 (broad s, 2 H,  $\text{OCH}_2$ ), 1.35 (t, 9 H,  $^3J_{\text{HH}} = 6.2$ ,  $\text{CH}_2\text{CH}_3$ ), the OH signal was not observed.

***Spectroscopic data of  $[\text{RuCl}(\text{D}_2\text{O})(\eta^6\text{-C}_6\text{H}_5\text{OCH}_2\text{CH}_2\text{CH}_2\text{OH})\{\text{P}(\text{OEt})_3\}][\text{Cl}]$ .***

$^{31}\text{P}\{^1\text{H}\}$  NMR,  $\text{D}_2\text{O}$ ,  $\delta$ : 117.4 (s).

$^1\text{H}$  NMR,  $\text{D}_2\text{O}$ ,  $\delta$ : 6.12 (m, 1 H,  $\text{CH}_{\text{meta}}$ ), 6.00 (m, 1 H,  $\text{CH}_{\text{meta}}$ ), 5.84 (d, 1 H,  $^3J_{\text{HH}} = 6.4$ ,  $\text{CH}_{\text{ortho}}$ ), 5.27 (dd, 1 H,  $^3J_{\text{HH}} = 6.4$ ,  $^4J_{\text{PH}} = 2.0$ ,  $\text{CH}_{\text{ortho}}$ ), 5.23 (t, 1 H,  $^3J_{\text{HH}} = 5.2$ ,  $\text{CH}_{\text{para}}$ ), 4.26 (t, 2 H,  $^3J_{\text{HH}} = 3.6$ ,  $\text{OCH}_2$ ), 4.07 (dq, 6 H,  $^3J_{\text{PH}} = 14.4$ ,  $^3J_{\text{HH}} = 6.8$ ,  $\text{CH}_2\text{CH}_3$ ), 3.90 (m, 2 H,  $\text{OCH}_2$ ), 1.24 (dt, 9 H,  $^4J_{\text{PH}} = ^3J_{\text{HH}} = 6.8$ ,  $\text{CH}_2\text{CH}_3$ ), the OH signal was not observed.

***Spectroscopic data of  $[\text{RuCl}_2(\eta^6\text{-C}_6\text{H}_5\text{CH}_2\text{CH}_2\text{CH}_2\text{CH}_2\text{OH})\{\text{P}(\text{OEt})_3\}]$ .***

$^{31}\text{P}\{^1\text{H}\}$  NMR,  $\text{D}_2\text{O}$ ,  $\delta$ : 115.3 (s).

$^1\text{H}$  NMR,  $\text{D}_2\text{O}$ ,  $\delta$ : 6.12 (m, 2 H,  $\text{CH}_{\text{meta}}$ ), 6.01 (d, 2 H,  $^3J_{\text{HH}} = 5.7$ ,  $\text{CH}_{\text{ortho}}$ ), 5.85 (m, 1 H,  $\text{CH}_{\text{para}}$ ), 4.35 (dq, 6 H,  $^3J_{\text{PH}} = 7.1$ ,  $^3J_{\text{HH}} = 7.1$ ,  $\text{POCH}_2$ ), 3.92 (t, 2 H,  $^3J_{\text{HH}} = 6.5$ ,  $\text{CH}_2\text{OH}$ ), 2.76 (t, 2 H,  $^3J_{\text{HH}} = 7.5$ ,  $\text{PhCH}_2$ ), 2.16 (m, 2 H,  $\text{CH}_2$ ), 1.55 (t, 3 H,  $^3J_{\text{HH}} = 7.1$ ,  $\text{CH}_3$ ), the OH signal was not observed.

$^{13}\text{C}\{^1\text{H}\}$  NMR,  $\text{D}_2\text{O}$ ,  $\delta$ : 113.7 (d,  $^2J_{\text{PC}} = 7.1$ ,  $\text{C}_{\text{ipso}}$ ), 89.7 (d,  $^2J_{\text{PC}} = 7.0$ ,  $\text{CH}_{\text{meta}}$  or  $\text{CH}_{\text{ortho}}$ ), 89.4 (s,  $\text{CH}_{\text{meta}}$  or  $\text{CH}_{\text{ortho}}$ ), 81.6 (s,  $\text{CH}_{\text{para}}$ ), 63.5 (d,  $^2J_{\text{PC}} = 6.0$ ,  $\text{POCH}_2$ ), 60.8 (s,  $\text{CH}_2\text{OH}$ ), 30.9 and 29.1 (both s,  $\text{PhCH}_2\text{CH}_2$ ), 15.3 (d,  $^3J_{\text{PC}} = 6.3$ ,  $\text{CH}_3$ ).

***Spectroscopic data of  $[RuCl(D_2O)(\eta^6-C_6H_5CH_2CH_2CH_2CH_2OH)\{P(OEt)_3\}][Cl]$ .***

$^{31}P\{^1H\}$  NMR,  $D_2O$ ,  $\delta$ : 114.8 (s).

$^1H$  NMR,  $D_2O$ ,  $\delta$ : 5.87-5.76 (m, 3 H,  $CH_{arene}$ ), 5.63 (m, 1 H,  $CH_{arene}$ ), 5.59 (m, 1 H,  $CH_{arene}$ ), 4.35 (m, 6 H,  $POCH_2$ ), 3.62 (t, 2 H,  $^3J_{HH} = 6.3$ ,  $CH_2$ ), 2.49 (m, 2 H,  $CH_2$ ), 1.86 (m, 2 H,  $CH_2$ ), 1.55 (m, 3 H,  $CH_3$ ), the OH signal was not observed.

$^{13}C\{^1H\}$  NMR,  $D_2O$ ,  $\delta$ : 114.1 (d,  $^2J_{PC} = 7.1$ ,  $C_{ipso}$ ), 91.3 (d,  $^2J_{PC} = 9.1$ , CH meta or  $CH_{ortho}$ ), 89.2 and 87.0 (s,  $CH_{meta}$  or  $CH_{ortho}$ ), 84.8 (d,  $^2J_{PC} = 5.0$ ,  $CH_{meta}$  or  $CH_{ortho}$ ), 80.9 (s,  $CH_{para}$ ), 63.8 (d,  $^2J_{PC} = 6.2$ ,  $POCH_2$ ), 60.7 (s,  $CH_2OH$ ), 30.8 and 29.1 (both s,  $PhCH_2CH_2$ ), 15.3 (d,  $^3J_{PC} = 6.3$ ,  $CH_3$ ).

***Spectroscopic data of  $[RuCl(\eta^6:\kappa^1(O)-C_6H_5OCH_2CH_2CH_2OH)\{P(OEt)_3\}][Cl]$ .***

$^{31}P\{^1H\}$  NMR,  $D_2O$ ,  $\delta$ : 114.7 (s).

$^1H$  NMR,  $D_2O$ ,  $\delta$ : 6.43 (m, 1 H,  $CH_{arene}$ ), 6.28 (m, 1 H,  $CH_{arene}$ ), 5.94 (m, 1 H,  $CH_{arene}$ ), 5.50 (m, 1 H,  $CH_{arene}$ ), 5.19 (m, 1 H,  $CH_{arene}$ ), 4.35 (m, 6 H,  $POCH_2$ ), 4.10 (m, 1 H,  $CH_2$ ), 3.51 (m, 1 H,  $CH_2$ ), 3.12 (m, 1 H,  $CH_2$ ), 2.66 (m, 1 H,  $CH_2$ ), 2.39 (m, 1 H,  $CH_2$ ), 1.86 (m, 1 H,  $CH_2$ ), 1.61 (m, 3 H,  $CH_3$ ), the OH signal was not observed.

$^{13}C\{^1H\}$  NMR,  $D_2O$ ,  $\delta$ : 103.3 (d,  $^2J_{PC} = 10.1$ ,  $CH_{ortho}$  or  $CH_{meta}$ ), 84.8 (d,  $^2J_{PC} = 17.1$ ,  $CH_{ortho}$  or  $CH_{meta}$ ), 86.7 and 82.1 (both s,  $CH_{meta}$ ), 73.3 ( $CH_{para}$ ), 64.0 (s,  $CH_2OH$ ), 28.6 and 27.1 (both s,  $PhCH_2CH_2$ ), 15.3 (d,  $^3J_{PC} = 6.3$ ,  $CH_3$ ).

Signal attributions have been made with the help of  $^1H$ - $^1H$  and  $^1H$ - $^{13}C$  correlations NMR spectroscopy and on the basis of the following observations:

(a) When NaCl was added to aqueous solution of **1b**, only the signals corresponding to the dichloro-complex  $[RuCl_2(\eta^6-C_6H_5OCH_2CH_2OH)\{P(OEt)_3\}]$  were observed. In particular, under these conditions the  $^{31}P\{^1H\}$  NMR spectra showed only one singlet resonance at 117.9 ppm.

(b) When NaCl was added to aqueous solution of **4b**, only the signals corresponding to the dichloro-complex  $[\text{RuCl}_2(\eta^6\text{-C}_6\text{H}_5\text{CH}_2\text{CH}_2\text{CH}_2\text{OH})\{\text{P}(\text{OEt})_3\}]$  were observed. In particular, under these conditions the  $^{31}\text{P}\{^1\text{H}\}$  NMR spectra showed only one singlet resonance at 115.3 ppm.

(c) NMR spectra of aqueous solution of  $[\text{RuCl}_2(\eta^6:\kappa^1(\text{O})\text{-C}_6\text{H}_5\text{CH}_2\text{CH}_2\text{CH}_2\text{OH})\{\text{P}(\text{OEt})_3\}][\text{SbF}_6]$  showed signals corresponding to the tethered cation  $[\text{RuCl}_2(\eta^6:\kappa^1(\text{O})\text{-C}_6\text{H}_5\text{CH}_2\text{CH}_2\text{CH}_2\text{OH})\{\text{P}(\text{OEt})_3\}]^+$  and the aquo-derivative  $[\text{RuCl}(\text{D}_2\text{O})(\eta^6\text{-C}_6\text{H}_5\text{CH}_2\text{CH}_2\text{CH}_2\text{OH})\{\text{P}(\text{OEt})_3\}]^+$ .

## 5. Relative energies of $[\text{RuCl}_2(\eta^6\text{-C}_6\text{H}_5\text{-X-CH}_2\text{CH}_2\text{OH})\{\text{P}(\text{OMe})\}]$ (X = O, CH<sub>2</sub>) in function of the dihedral angle C<sub>ortho</sub>-C<sub>ipso</sub>-X-C<sub>(CH<sub>2</sub>)</sub>.

**Table S7.** Relative energies, C<sub>ipso</sub>-O bond distances and C<sub>ipso</sub>-O bond order as a function of the  $\theta$  values.<sup>a</sup>

| $\theta$ | $E_{\text{rel}} / \text{kcal mol}^{-1}$ | $r(\text{C-O}) / \text{\AA}$ | C-O Wiberg Index |
|----------|-----------------------------------------|------------------------------|------------------|
| 0        | 0.0                                     | 1.337                        | 1.093            |
| 9.2      | -0.2                                    | 1.337                        | 1.092            |
| 15       | -0.1                                    | 1.337                        | 1.091            |
| 30       | 1.0                                     | 1.340                        | 1.082            |
| 45       | 2.8                                     | 1.344                        | 1.066            |
| 60       | 3.5                                     | 1.349                        | 1.043            |
| 90       | 4.3                                     | 1.358                        | 1.001            |

All data have been computed at the BP86/def2-SVP level. <sup>a</sup>  $\theta = \text{C}_{\text{ortho}}\text{-C}_{\text{ipso}}\text{-O-C}$  dihedral angle.

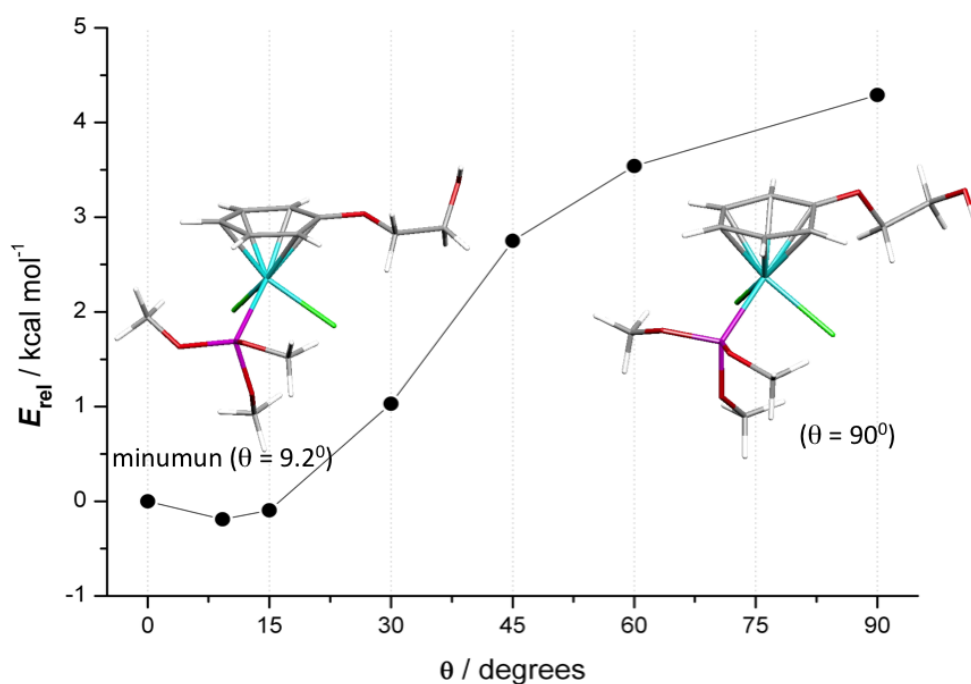

**Table S8.** Relative energies, C<sub>ipso</sub>-CH<sub>2</sub> bond distances and C<sub>ipso</sub>-CH<sub>2</sub> bond order as a function of the  $\theta$  values.<sup>a</sup>

| $\theta$ | $E_{\text{rel}} / \text{kcal mol}^{-1}$ | $r(\text{C}-\text{CH}_2) / \text{\AA}$ | C-CH <sub>2</sub> Wiberg Index |
|----------|-----------------------------------------|----------------------------------------|--------------------------------|
| 0        | 0.0                                     | 1.513                                  | 1.027                          |
| 15       | 0.2                                     | 1.512                                  | 1.028                          |
| 30       | 0.8                                     | 1.512                                  | 1.028                          |
| 45       | 1.5                                     | 1.512                                  | 1.027                          |
| 60       | 1.2                                     | 1.515                                  | 1.022                          |
| 75       | 0.5                                     | 1.515                                  | 1.014                          |
| 90       | 0.4                                     | 1.515                                  | 1.014                          |

All data have been computed at the BP86/def2-SVP level. <sup>a</sup>  $\theta = \text{C}_{\text{ortho}}-\text{C}_{\text{ipso}}-\text{CH}_2-\text{C}$  dihedral angle.

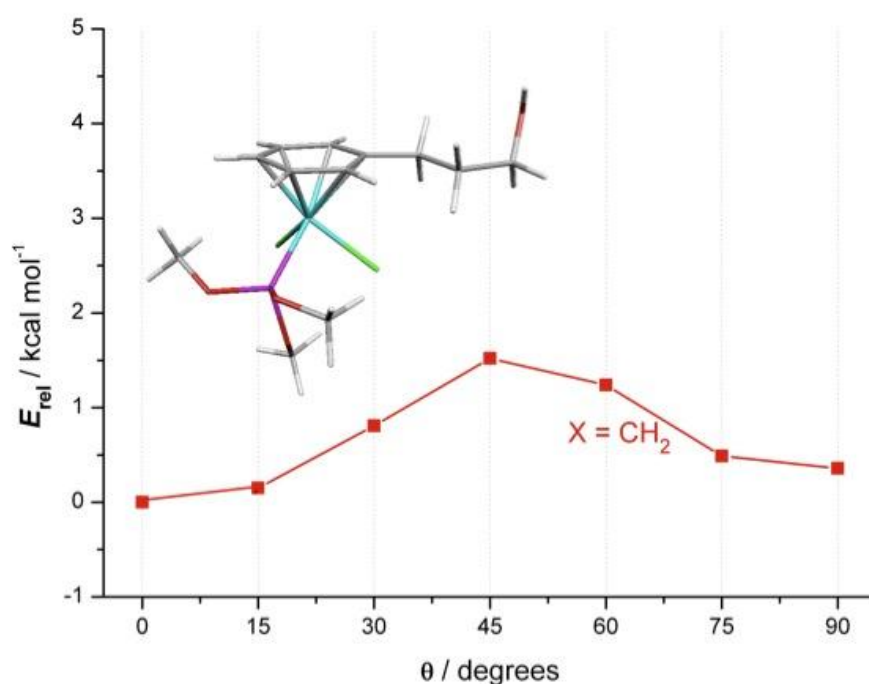

## 6. Cartesian coordinates and total energies of model complexes 1M and 4M.

Cartesian coordinates (in Å) and total energies (in a. u., ZPVE included) of all the stationary points discussed in the text. All calculations have been performed at the BP86/def2-SVP level of theory.

**1M:** E= -2162.471666

|   |              |              |              |
|---|--------------|--------------|--------------|
| C | 1.560215000  | -2.066960000 | 0.331937000  |
| H | 2.071924000  | -2.376901000 | 1.252871000  |
| C | 0.350509000  | -2.699613000 | -0.098510000 |
| H | -0.075647000 | -3.504166000 | 0.519819000  |
| C | -0.329561000 | -2.290434000 | -1.283554000 |
| H | -1.235511000 | -2.810043000 | -1.622695000 |
| C | 0.136512000  | -1.101652000 | -1.943998000 |
| H | -0.423339000 | -0.688341000 | -2.797576000 |
| C | 1.329263000  | -0.424680000 | -1.511369000 |
| H | 1.657627000  | 0.481016000  | -2.036508000 |
| C | 2.087195000  | -0.963075000 | -0.407558000 |
| C | 3.658275000  | 0.859828000  | -0.410917000 |
| H | 2.836468000  | 1.591304000  | -0.246024000 |
| H | 3.894675000  | 0.800594000  | -1.500195000 |
| C | 4.895244000  | 1.262237000  | 0.383477000  |
| H | 5.116951000  | 2.330216000  | 0.130867000  |
| H | 4.641748000  | 1.232162000  | 1.463594000  |
| C | -0.947390000 | 2.744697000  | -1.850188000 |
| H | -0.061025000 | 2.613102000  | -1.192440000 |
| H | -1.521459000 | 3.626614000  | -1.498153000 |
| H | -0.623142000 | 2.910238000  | -2.896936000 |
| C | -2.765000000 | 1.925873000  | 1.890144000  |

|    |              |              |              |
|----|--------------|--------------|--------------|
| H  | -1.855371000 | 1.670317000  | 2.468242000  |
| H  | -3.555881000 | 1.174255000  | 2.088935000  |
| H  | -3.128703000 | 2.934108000  | 2.169754000  |
| C  | -3.675397000 | -1.386267000 | -0.724295000 |
| H  | -3.477471000 | -1.878735000 | -1.701153000 |
| H  | -4.755718000 | -1.485152000 | -0.497296000 |
| H  | -3.086004000 | -1.864444000 | 0.085485000  |
| Cl | 0.618502000  | 1.356790000  | 1.342826000  |
| Cl | -1.530388000 | -1.195662000 | 2.017853000  |
| O  | 3.221879000  | -0.431933000 | 0.058986000  |
| O  | 6.008573000  | 0.409007000  | 0.203383000  |
| H  | 6.312780000  | 0.504592000  | -0.718844000 |
| O  | -1.783300000 | 1.573894000  | -1.849300000 |
| O  | -3.400809000 | 0.016905000  | -0.807243000 |
| O  | -2.466110000 | 1.995124000  | 0.483994000  |
| P  | -1.977257000 | 0.742607000  | -0.438299000 |
| Ru | -0.182115000 | -0.563698000 | 0.113673000  |

**4M:** E= -2126.574145

|    |              |              |              |
|----|--------------|--------------|--------------|
| C  | 1.443965000  | -2.140292000 | 0.294822000  |
| H  | 1.878680000  | -2.533466000 | 1.225571000  |
| C  | 0.217162000  | -2.698798000 | -0.207439000 |
| H  | -0.269543000 | -3.510964000 | 0.353438000  |
| C  | -0.390140000 | -2.202206000 | -1.395870000 |
| H  | -1.309341000 | -2.656970000 | -1.789494000 |
| C  | 0.166927000  | -1.018840000 | -1.993369000 |
| H  | -0.342419000 | -0.542486000 | -2.845445000 |
| C  | 1.364296000  | -0.427983000 | -1.474775000 |
| H  | 1.753362000  | 0.488732000  | -1.936918000 |
| C  | 2.033710000  | -1.006184000 | -0.333736000 |
| C  | 3.831576000  | 0.872404000  | -0.385440000 |
| H  | 3.095493000  | 1.700076000  | -0.289634000 |
| H  | 3.991788000  | 0.703894000  | -1.476787000 |
| C  | 5.163578000  | 1.308604000  | 0.241992000  |
| H  | 5.500878000  | 2.265391000  | -0.227288000 |
| H  | 5.015769000  | 1.519149000  | 1.323092000  |
| C  | -1.003369000 | 2.748895000  | -1.850175000 |
| H  | -0.090522000 | 2.603391000  | -1.233165000 |
| H  | -1.560993000 | 3.624403000  | -1.458432000 |
| H  | -0.722860000 | 2.931895000  | -2.906290000 |
| C  | -2.789333000 | 1.916677000  | 1.911867000  |
| H  | -1.872717000 | 1.666443000  | 2.481112000  |
| H  | -3.574217000 | 1.160693000  | 2.117958000  |
| H  | -3.156090000 | 2.922869000  | 2.194744000  |
| C  | -3.727369000 | -1.389598000 | -0.671213000 |
| H  | -3.576335000 | -1.901543000 | -1.646385000 |
| H  | -4.799079000 | -1.468717000 | -0.399333000 |
| H  | -3.114562000 | -1.864700000 | 0.122591000  |
| Cl | 0.577840000  | 1.365989000  | 1.325621000  |
| Cl | -1.525506000 | -1.192144000 | 2.017828000  |
| O  | 6.172480000  | 0.305237000  | 0.179233000  |
| H  | 6.386803000  | 0.169142000  | -0.763389000 |
| O  | -1.841778000 | 1.579078000  | -1.837465000 |
| O  | -3.434745000 | 0.006959000  | -0.792829000 |
| O  | -2.503616000 | 1.987625000  | 0.503287000  |
| P  | -2.015830000 | 0.742763000  | -0.429212000 |
| Ru | -0.196237000 | -0.556927000 | 0.095853000  |
| C  | 3.272991000  | -0.391049000 | 0.276941000  |
| H  | 4.070908000  | -1.166509000 | 0.296997000  |
| H  | 3.034495000  | -0.163741000 | 1.339629000  |

## 7. References

- (1) Although this compound has been initially described as the dimer [ $\{\text{RuCl}(\mu\text{-Cl})(\eta^6\text{-C}_6\text{H}_5\text{CH}_2\text{CH}_2\text{CH}_2\text{OH})\}_2$ ], its monomeric structure, at least in solid state, has been recently evidenced. See, Čubrilo, J.; Hartenbach, I.; Schleid, T.; Winter, R. F. Z. *Anorg. Allg. Chem.* **2006**, 632, 400.
- (2) Miyaki, Y.; Onishi, T.; Kurosawa, H. *Inorg. Chim. Acta* **2000**, 300-302, 369.
- (3) Lastra-Barreira, B.; Díez, J.; Crochet, P. *Green. Chem.* **2009**, 11, 1681.
- (4) *Collect* data collection software, Bruker AXS, Delft, The Netherlands, **2004**.
- (5) Otwinowski, Z.; Minor, W. *Methods Enzymol.* **1997**, 276, 307.
- (6) SORTAV. Blessing, R. H. *Acta Cryst.* **1995**, A51, 33.
- (7) *CrysAlis<sup>Pro</sup> CCD & CrysAlis<sup>Pro</sup> RED* Oxford Diffraction Ltd.: Oxford, UK, 2008.
- (8) Farrugia, L. J. *J. Appl. Crystallogr.* **1999**, 32, 837.
- (9) Altomare, A.; Cascarano, G.; Giacovazzo, C.; Guagliardi, A.; Burla, M. C.; Polidori, G.; Camalli, M. *J. Appl. Crystallogr.* **1994**, 27, 435.
- (10) Beurskens, P. T.; Admiraal, G.; Beurskens, G.; Bosman, W. P.; García-Granda, S.; Gould, R. O.; Smits, J. M. M.; Smykalla, C. *The DIRDIF Program System*; Technical Report of the Crystallographic Laboratory; University of Nijmegen: Nijmegen, The Netherlands, **1999**.
- (11) Sheldrick, G. M. *SHELXL97: Program for the Refinement of Crystal Structures*; University of Göttingen: Göttingen, Germany, **1997**.
- (12) *International Tables for X-Ray Crystallography*; Kynoch Press; Birmingham, UK, **1974**; Vol. IV (present distributor: Kluwer Academic Publishers; Dordrecht, The Netherlands).
- (13) PARST. Nardelli, M. *Comput. Chem.* **1983**, 7, 95.

- (14) Spek, A. L. *PLATON: A Multipurpose Crystallographic Tool*; University of Utrecht, The Netherlands, **2007**.
